# Supplementary material
Source: HighWire-hosted journal article supplement (https://emj.bmj.com/content/40/4/271)
Supplement: inline-supplementary-material-1 [file inline-supplementary-material-1.pdf]

Supplementary file 1: Questions deemed out of scope of pre-hospital critical care and excluded following round 1

|                                                                                                                                                                                                                                                                                      |
|--------------------------------------------------------------------------------------------------------------------------------------------------------------------------------------------------------------------------------------------------------------------------------------|
| Do older frail patients benefit from community-based emergency care teams compared to usual care                                                                                                                                                                                     |
| Do Community Emergency medicine care services provide improved patient outcomes compared to standard care                                                                                                                                                                            |
| Do community emergency medicine placements provide superior training in emergency medicine to in-hospital placements?                                                                                                                                                                |
| Does discharging patients in the community (Community Emergency Medicine) lead to improved patient and system outcomes? (Reduced hospital-associated harms / improved staff developed and retention / system efficiencies (reduced activity in ED and admissions) / economic benefit |
| Does a "one in, one out" policy in the Emergency Department improve overall waiting times?                                                                                                                                                                                           |
