# Supplementary material
Source: HighWire-hosted journal article supplement (https://emj.bmj.com/content/40/4/271)
Supplement: inline-supplementary-material-3 [file inline-supplementary-material-3.pdf]

## Supplementary file 3: Questions scored in round 3 with their mean score

|                                                                                                                                                        | Mean score |
|--------------------------------------------------------------------------------------------------------------------------------------------------------|------------|
| <b>Medical cardiac arrest</b>                                                                                                                          |            |
| To which out of hospital cardiac arrest patients should critical care teams be dispatched?                                                             | 7.3        |
| Which out of hospital cardiac arrest patients do not benefit from transfer to a PCI centre?                                                            | 4.4        |
| How do we identify out of hospital cardiac arrest patients to whom critical care team should be dispatched from information received during the call?  | 6.8        |
| In patients with medical out of hospital cardiac arrest attended by pre-hospital critical care teams, which interventions beyond ALS improve outcomes? | 7.7        |
| <b>Trauma including TCA</b>                                                                                                                            |            |
| What is the role of thoracotomy in blunt trauma and in exsanguinating cardiac arrest?                                                                  | 5.9        |
| What is the morbidity from pre-hospital thoracostomy in adult patients?                                                                                | 5.8        |
| Which patients with penetrating trauma benefit from advanced on-scene care?                                                                            | 5.7        |
| What clinical features and interventions are associated with survival to hospital discharge in patients with traumatic cardiac arrest?                 | 6.3        |

## Supplementary file 3: Questions scored in round 3 with their mean score

|                                                                                                                                                                                       |     |
|---------------------------------------------------------------------------------------------------------------------------------------------------------------------------------------|-----|
| <b>PHEA/airway/sedation/analgesia</b>                                                                                                                                                 |     |
| In patients with ROSC following OOHCA, does PHEA improve patient outcomes?                                                                                                            | 6.7 |
| In trauma patients undergoing pre-hospital RSI, is there an impact on patient focussed outcome (e.g. mortality) correlated with 999 call time to time of RSI delivery?                | 6.2 |
| Which is the best PHEA drug dosing regime to optimise first pass success and avoid drug-induced complications (e.g. hypotension) in post ROSC, head injury and polytrauma patients?   | 3.9 |
| <b>Neurological emergencies</b>                                                                                                                                                       |     |
| What is the benefit offered to head injured patients by critical care teams?                                                                                                          | 6.6 |
| In patients with severe traumatic brain injury, does pre-hospital administration of osmotic agents result in improved survival or neurological outcome, and what is the optimal dose? | 6.8 |
| Does pre-hospital administration of FFP or whole blood improve short and longer-term outcomes?                                                                                        | 5.5 |
| Does pre-hospital reversal of anticoagulation improve outcomes in patients with traumatic brain injury?                                                                               | 6.4 |
| Does invasive arterial blood pressure measurement improve patient care and outcomes without adversely affecting scene times?                                                          | 4.9 |
| Is PHEA superior to sedation in the management of agitated mild-moderate TBI?                                                                                                         | 4.2 |
| <b>Major haemorrhage/blood products</b>                                                                                                                                               |     |

## Supplementary file 3: Questions scored in round 3 with their mean score

|                                                                                                                                                                              |     |
|------------------------------------------------------------------------------------------------------------------------------------------------------------------------------|-----|
| What is the optimal dose of calcium in major traumatic haemorrhage and does pre-hospital administration improve patient outcomes?                                            | 6.1 |
| REBOA: does it improve survival in major trauma patients with major internal haemorrhage, and is it feasible in less heavily urbanised settings?                             | 4.5 |
| What method of volume resuscitation improves outcomes in injured patients with haemorrhagic shock?                                                                           | 7.5 |
| What method of volume resuscitation improves outcomes in patients with traumatic brain injury?                                                                               | 7.3 |
| <b>Triage</b>                                                                                                                                                                |     |
| Which patients with frailty should be triaged to a major trauma centre?                                                                                                      | 6.1 |
| Would the use of digital health technology improve dispatch of enhanced care teams to critically unwell patients?                                                            | 7.3 |
| Does transfer to a neurological centre for consideration of time critical thrombectomy improve outcome in patients suffering a suspected stroke in the pre-hospital setting? | 6.5 |
| <b>Dispatch</b>                                                                                                                                                              |     |
| Is pre-hospital critical care clinician dispatch superior to standard ambulance service dispatch?                                                                            | 6.1 |
| How can critical care dispatch be improved to quickly and accurately dispatch critical care teams to patients?                                                               | 6.9 |
| Impact/benefit of pre-hospital critical care teams                                                                                                                           |     |
| What other benefits do pre-hospital critical care teams bring, other than medical outcomes?                                                                                  | 5.5 |

## Supplementary file 3: Questions scored in round 3 with their mean score

|                                                                                                                                                                                           |     |
|-------------------------------------------------------------------------------------------------------------------------------------------------------------------------------------------|-----|
| Is physician led pre-hospital care cost effective?                                                                                                                                        | 3.8 |
| <b>Well-being and mental health</b>                                                                                                                                                       |     |
| How can we identify risks to well-being and protect the mental health of pre-hospital critical care providers?                                                                            | 7.3 |
| What is the effect of stress on performance of pre-hospital clinicians exposed to a recurring case load of critically injured patients?                                                   | 4.7 |
| <b>Other</b>                                                                                                                                                                              |     |
| What is the role of POCUS in pre-hospital critical care in improving patient outcomes?                                                                                                    | 6.1 |
| Is there any benefit to patients by using pre-hospital point of care testing                                                                                                              | 6.5 |
| In cases of pre-hospital death, what strategies can be employed by pre-hospital practitioners to improve the experience for friends and family who receive bad news in the acute setting? | 6.0 |
| What pre-hospital simulation strategy is optimal to improve patient, clinician and procedural outcomes?                                                                                   | 6.0 |

Questions scored from 1 to 9 with 1 indicating should not be studied, and 9 indicating the question is of highest priority. Questions scoring 6.0 or greater i.e. of slightly high priority or more were brought forward to the ranking stage.
